# Supplementary material
Source: PubMed Central journal article supplement (PMC2948529)
Supplement: NIHMS31697-supplement.pdf [file NIHMS31697-supplement.pdf]

## Supplementary Online Content

Domchek SM, Friebel TM, Singer CF, et al. Association of risk-reducing surgery in *BRCA1* or *BRCA2* mutation carriers with cancer risk and mortality. *JAMA*. 2010;304(9):967-975.

**eTable 1.** Comparability of RRSO and non-RRSO participants

**eTable 2.** Deceased RRSO Participant Characteristics

This supplementary material has been provided by the authors to give readers additional information about their work.

Table 1. Comparability of RRSO and Non-RRSO Participants

|                                    | RRSO n=993       | Non-RRSO - 1489  |
|------------------------------------|------------------|------------------|
| Ascertainment (Median year, Range) | 1998 (1973-2007) | 1999 (1974-2008) |
| Genetic test disclosure (Median)   | 2001             | 2002             |
| RRM                                | 153 (15%)        | 104 (7%)         |
| BRCA1                              | 706 (71%)        | 881 (59%)        |
| BRCA2                              | 287 (29%)        | 608 (41%)        |
| Median Follow up (Range)           | 3.65 (0.52-27.4) | 4.29 (0.50-27.9) |
| HRT use: Yes                       | 182 (18%)        | 120 (8%)         |
| No                                 | 644 (65%)        | 1167 (78%)       |
| Unknown                            | 167 (17%)        | 202 (14%)        |

Table 2. Deceased RRSO Participant Characteristics

| Group                            | Mutation     | Age in Years of: |                         |                                                |                                  | Cause of Death                      |
|----------------------------------|--------------|------------------|-------------------------|------------------------------------------------|----------------------------------|-------------------------------------|
|                                  |              | RRSO             | Breast Cancer Diagnosis | Ovarian or Primary Peritoneal Cancer Diagnosis | Death                            |                                     |
| <i>No Cancer before RRSO</i>     | <i>BRCA1</i> | 41.0             | --                      | --                                             | 42.0                             | No cancer (never had cancer)        |
|                                  | <i>BRCA1</i> | 39.3             | 40.7                    | --                                             | 54.2                             | Breast Cancer                       |
|                                  | <i>BRCA1</i> | 37.5             | 42.5                    | --                                             | 43.5                             | Breast Cancer                       |
|                                  | <i>BRCA1</i> | 47.4             | 48.4                    | 50.1                                           | 54.6                             | Ovarian Cancer                      |
|                                  | <i>BRCA1</i> | 47.8             | --                      | 49.5                                           | 50.3                             | Ovarian Cancer                      |
|                                  | <i>BRCA1</i> | 37.4             | --                      | 43.1                                           | 45.6                             | Ovarian Cancer                      |
|                                  | <i>BRCA1</i> | 45.0             | --                      | --                                             | 48.0                             | Other Cancer, Leukemia at age 47    |
|                                  | <i>BRCA1</i> | 79.0             | --                      | --                                             | 80.7                             | Other cancer, Stomach cancer age 76 |
| <i>Breast Cancer before RRSO</i> | <i>BRCA2</i> | 53.7             | 52.4                    | --                                             | 61.1                             | Breast Cancer                       |
|                                  | <i>BRCA1</i> | 50.0             | 33.5                    | --                                             | 52.4                             | Breast Cancer                       |
|                                  | <i>BRCA1</i> | 58.6             | 57.1                    | --                                             | 67.4                             | Breast Cancer                       |
|                                  | <i>BRCA1</i> | 39.1             | 38.3                    | --                                             | 40.1                             | Breast Cancer                       |
|                                  | <i>BRCA1</i> | 35.7             | 35.2                    | --                                             | 39.5                             | Breast Cancer                       |
|                                  | <i>BRCA1</i> | 31.5             | 29.6                    | --                                             | 34.9                             | Breast Cancer                       |
|                                  | <i>BRCA1</i> | 32.9             | 30.6                    | --                                             | 33.6                             | Breast Cancer                       |
|                                  | <i>BRCA1</i> | 45.8             | 38.8                    | --                                             | 48.4                             | Breast Cancer                       |
|                                  | <i>BRCA1</i> | 34.4             | 34.3                    | --                                             | 37.7                             | Breast Cancer                       |
|                                  | <i>BRCA1</i> | 49.8             | 47.6                    | --                                             | 51.8                             | Breast Cancer                       |
|                                  | <i>BRCA2</i> | 61.8             | 55.0                    | --                                             | 75.0                             | Breast Cancer                       |
|                                  | <i>BRCA1</i> | 49.0             | 47.4                    | --                                             | 52.0                             | Breast Cancer                       |
|                                  | <i>BRCA1</i> | 38.8             | 38.0                    | --                                             | 41.6                             | Breast Cancer                       |
|                                  | <i>BRCA1</i> | 51.2             | 43.7                    | --                                             | 52.9                             | Breast Cancer                       |
|                                  | <i>BRCA2</i> | 51.6             | 50.1                    | --                                             | 54.5                             | Breast Cancer                       |
|                                  | <i>BRCA2</i> | 34.8             | 30.4                    | --                                             | 37.3                             | Breast Cancer                       |
|                                  | <i>BRCA2</i> | 62.3             | 51.1                    | --                                             | 64.5                             | Breast Cancer                       |
|                                  | <i>BRCA1</i> | 45.9             | 45.2                    | --                                             | 49.8                             | Breast Cancer                       |
|                                  | <i>BRCA1</i> | 44.6             | 36.3                    | 45.7                                           | 49.7                             | Ovarian Cancer                      |
|                                  | <i>BRCA1</i> | 55.5             | 41.9                    | --                                             | 60.1                             | Breast Cancer                       |
| <i>BRCA2</i>                     | 54.9         | 53.8             | --                      | 61.0                                           | Dead, unknown cause              |                                     |
| <i>BRCA1</i>                     | 44.0         | 43.0             | --                      | 49.9                                           | Dead, unknown cause              |                                     |
| <i>BRCA1</i>                     | 39.0         | 36.1             | --                      | 48.2                                           | Other Cancer, Leukemia at age 46 |                                     |
